# Supplementary material
Source: PubMed Central journal article supplement (PMC3561860)
Supplement: supp_125.22.5524_JCS111252.pdf [file supp_125.22.5524_JCS111252.pdf]

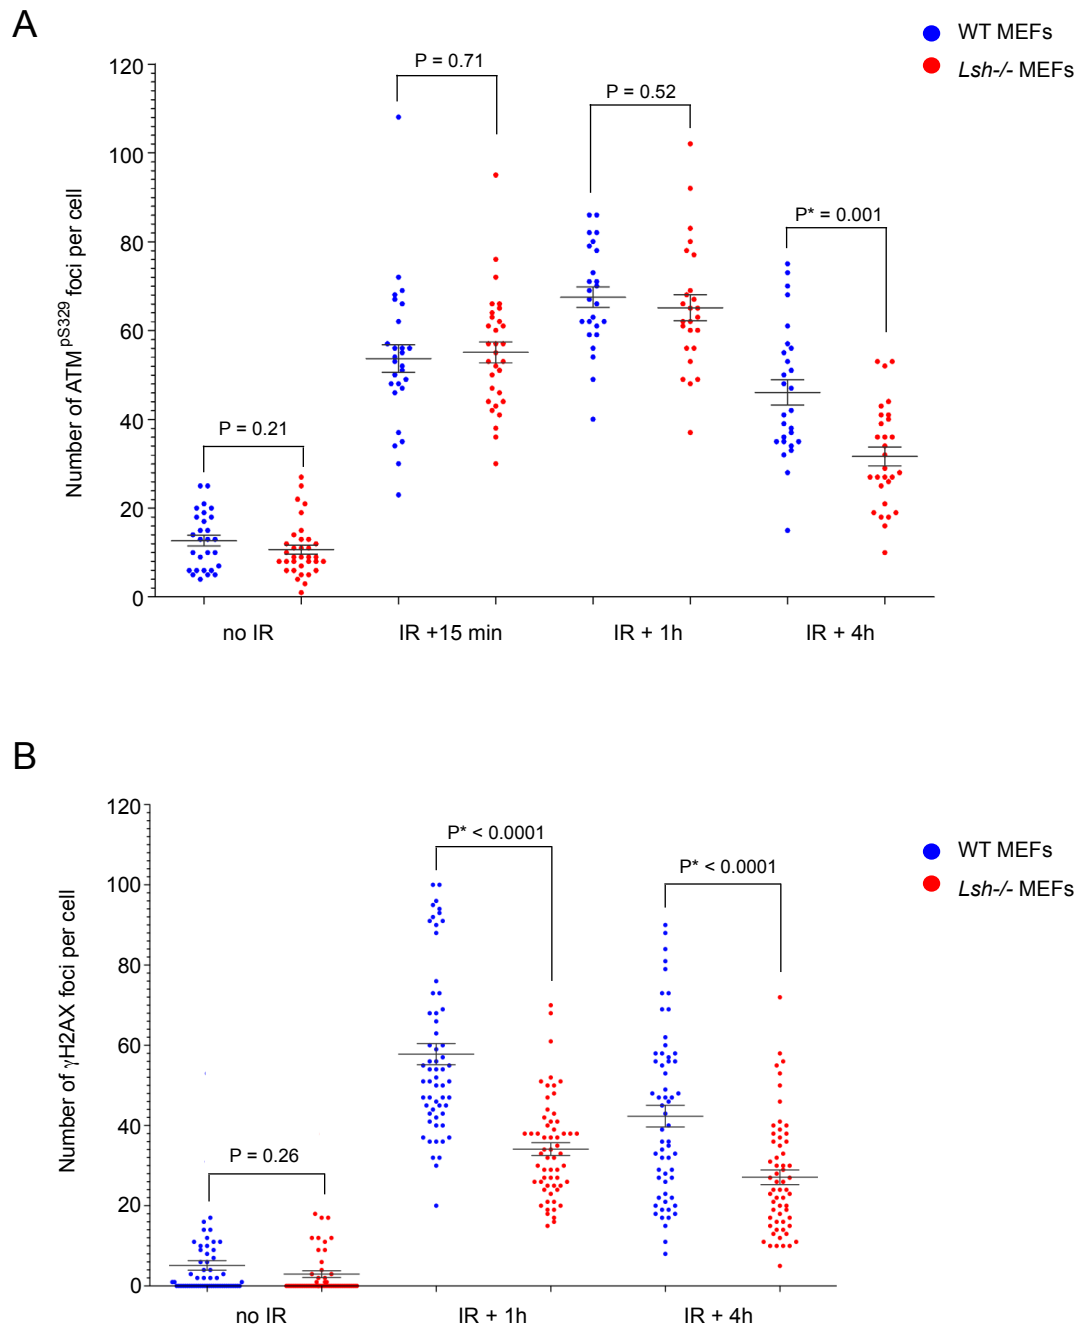

### Supplemental Figure 1 Quantification of ATM<sup>pS329</sup> and $\gamma$ H2AX foci in wild-type and *Lsh*<sup>-/-</sup> MEFs

**A.** Counts of ATM<sup>pS329</sup> foci in non-irradiated and irradiated wild-type and *Lsh*<sup>-/-</sup> MEFs at indicated time points. Each dot on the graph represents a single cell. The mean value and the standard error of the mean are indicated for each group of cells. Note that there is no significant difference between the wild-type and *Lsh*<sup>-/-</sup> cells in the number of ATM<sup>pS329</sup> foci observed 15 minutes and 1 hour post-IR indicating that the initial recognition of DSBs is not impaired in LSH-deficient cells. Comparable number of foci also correlates well with equal amount of DNA damage induced by IR in both cell lines as quantified by the comet assays in Figure 1D. However, the number of ATM<sup>pS329</sup> foci are significantly reduced in *Lsh*<sup>-/-</sup> MEFs 4 hours after IR. This is consistent with reduced  $\gamma$ H2AX levels in *Lsh*<sup>-/-</sup> MEFs at this time point and the existence of a feed back loop at later time points after DNA damage where spreading of  $\gamma$ H2AX from the break recruits more ATM in MDC1/MRN-dependent manner allowing continuous ATM signalling at slow repairing breaks (Lou et al, 2006; van Atticum and Gasser, 2009).

**B.** Counts of  $\gamma$ H2AX foci in wild-type and *Lsh*<sup>-/-</sup> MEFs. The mean value and the standard error are indicated. Note that *Lsh*<sup>-/-</sup> MEFs show reduced number of foci at 1h and 4h time points after IR, which is consistent with the reduced signal observed in Western blots.

**A**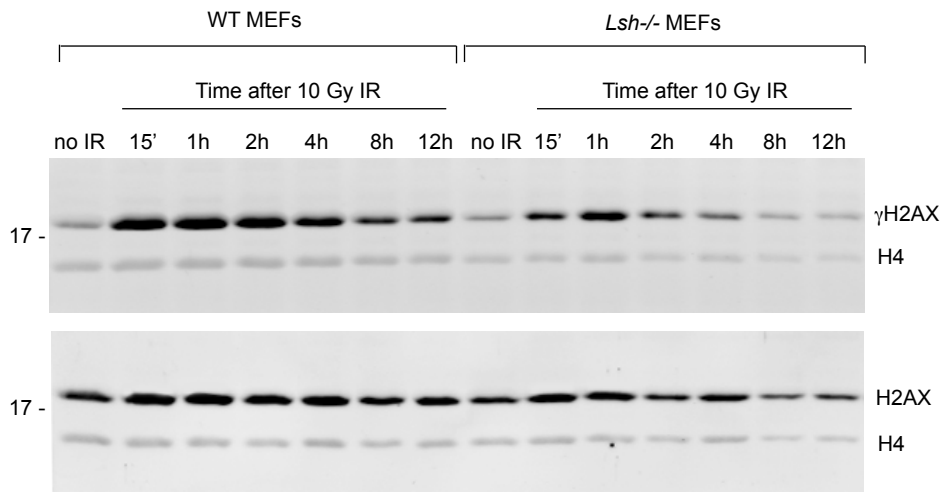**B**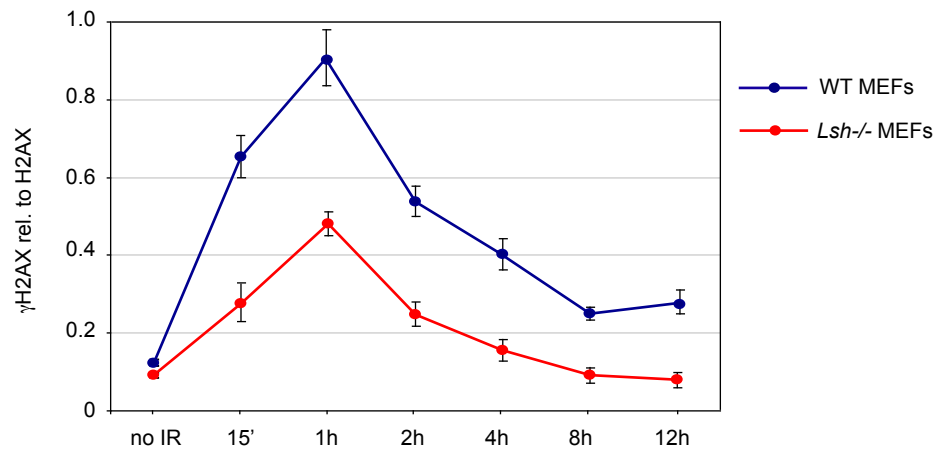**Supplemental Figure 2 Inefficient phosphorylation of H2AX in irradiated *Lsh*<sup>-/-</sup> MEFs**

**A.** A representative quantitative Western blot detecting  $\gamma$ H2AX, H2AX and histone H4 in nuclear extracts of wild type and *Lsh*<sup>-/-</sup> MEFs before and after exposure to 10Gy of ionizing radiation. Irradiated MEFs were collected at indicated time points.

**B.** Average levels of  $\gamma$ H2AX relative to H2AX in wild-type and *Lsh*<sup>-/-</sup> MEFs during recovery from IR quantified from Western blots representing three independent experiments (biological replicates). Note that *Lsh*<sup>-/-</sup> MEFs do not display reduced levels of H2AX. Histone H4 serves as endogenous loading control.

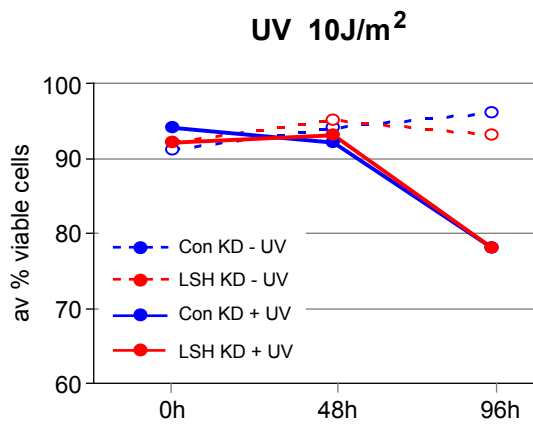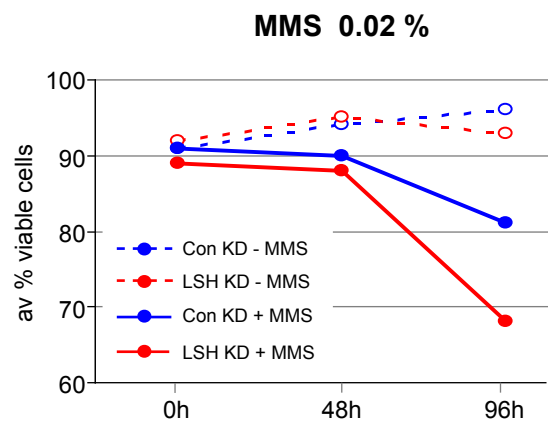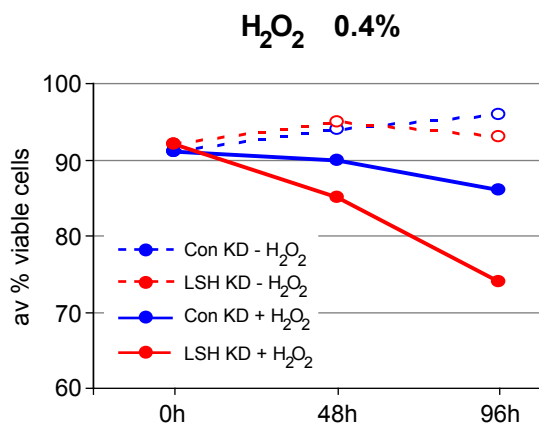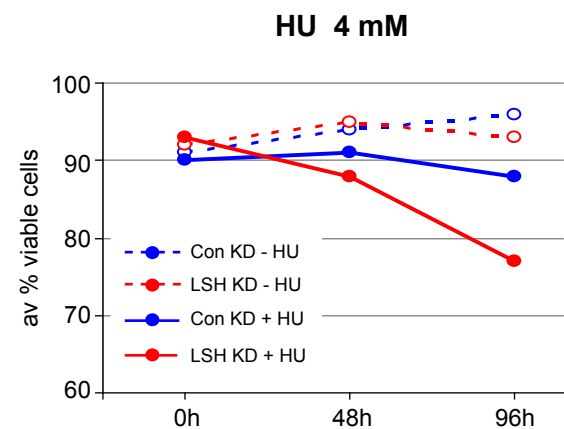

### Supplemental Figure 3 Sensitivity of control and LSH-deficient MRC5 cells to DNA damaging agents

Control MRC5 cells expressing non-silencing shRNA and LSH KD MRC5 cells were tested for viability after treatment with UV, MMS, hydroxyurea (HU) and hydrogen peroxide (H<sub>2</sub>O<sub>2</sub>). Note that LSH KD cells are more sensitive to most DNA damaging agents, but not UV or camptothecin (not shown). The % viable cells was determined as described in Figure 7D.

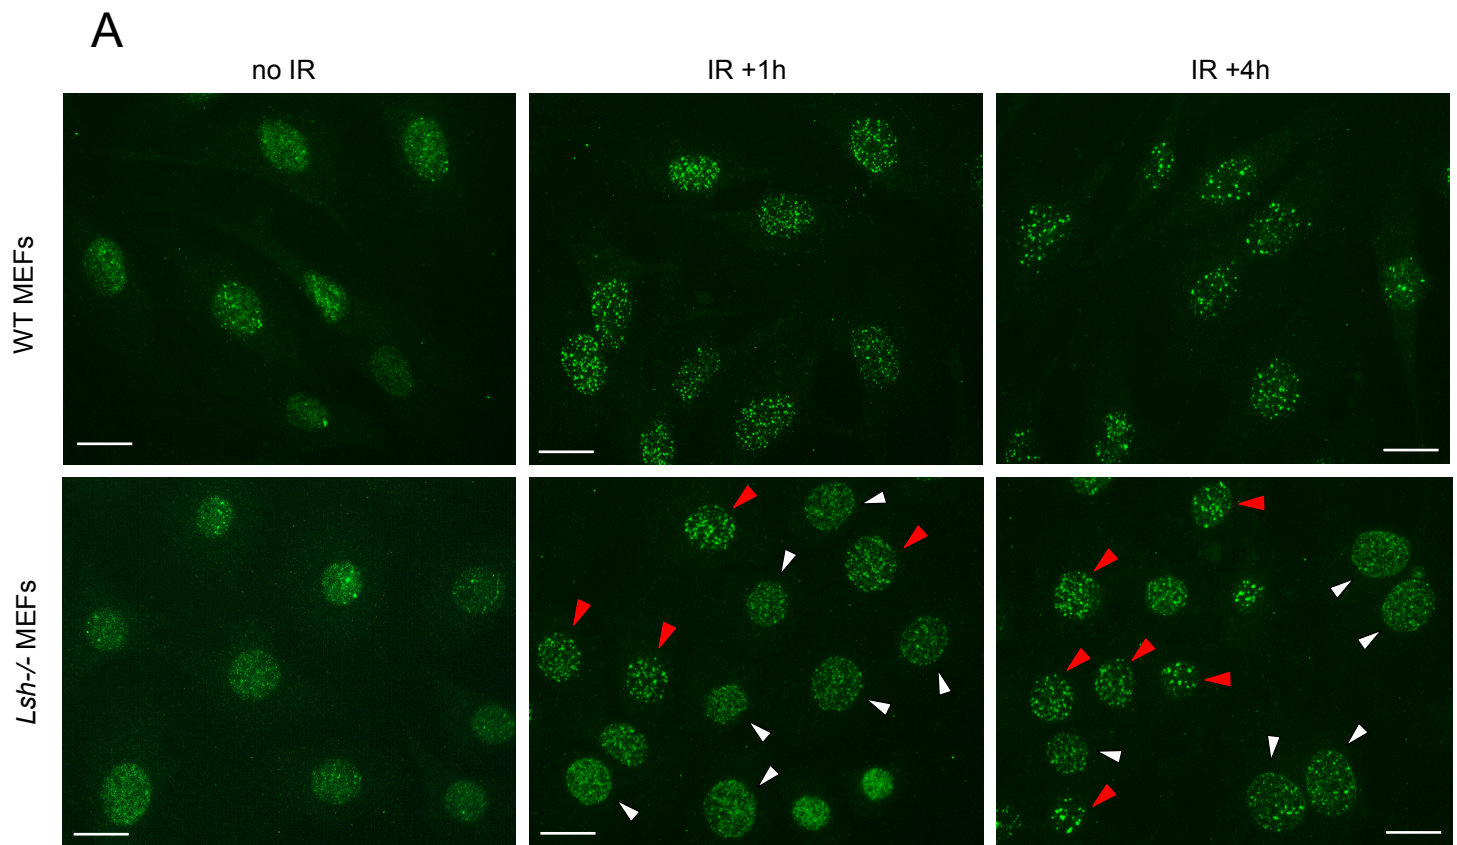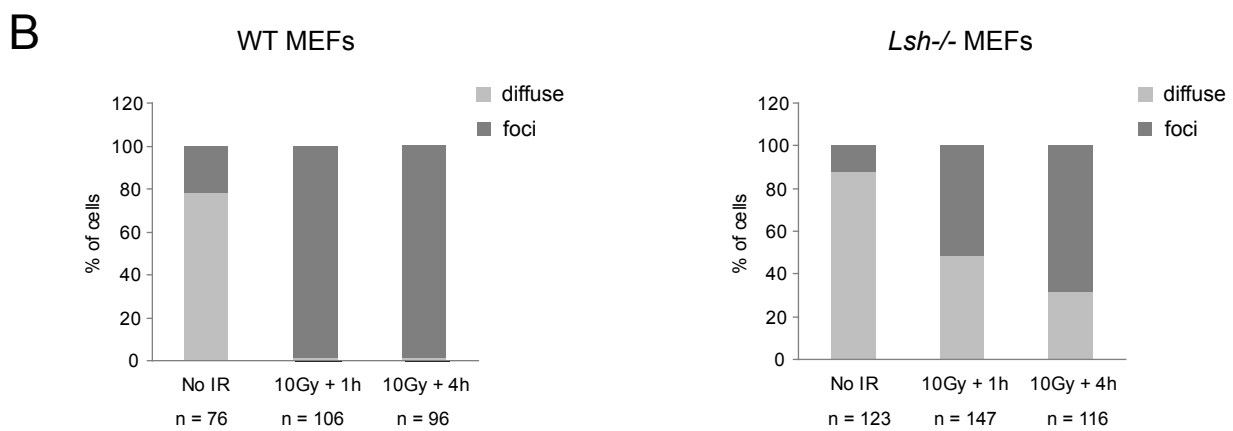

**Supplemental Figure 4 Localization of 53BP1 in wild type and *Lsh*<sup>-/-</sup> MEFs**

**A.** Representative images of wild type and *Lsh*<sup>-/-</sup> MEFs before and after IR (1- and 4-hour time points) stained with antibodies against 53BP1. In the panels showing irradiated *Lsh*<sup>-/-</sup> MEFs cells the white arrows indicate cells with diffuse 53BP1 staining and the red arrows point to cells that form discrete 53BP1 foci. The scale bar represents 10  $\mu$ m

**B.** Quantification of cells with diffuse and punctated 53BP1 staining. "n" indicates the number of cells counted at each time point.

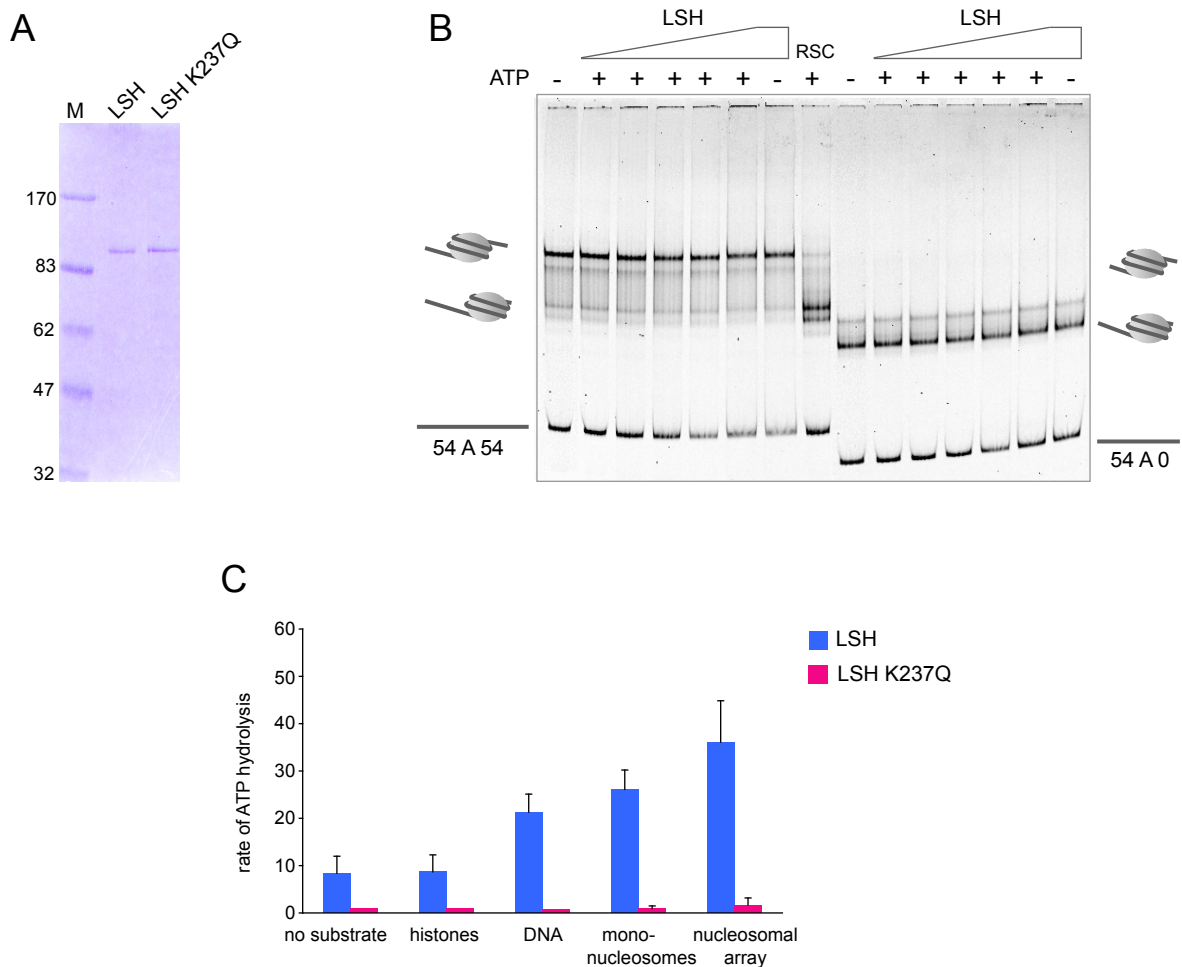

### Supplemental Figure 5 Nucleosome repositioning and ATPase activity of recombinant LSH

**A.** Recombinant wild type and mutant 6xHis-tagged LSH proteins were expressed in insect cells and purified by Ni-affinity chromatography followed by ion exchange chromatography to remove any LSH-bound DNA. M represents molecular weight marker.

**B.** Recombinant wild type LSH does not reposition either a centrally (54A54) or end positioned nucleosome (54A0) in the presence of ATP. Recombinant yeast RSC protein (100 nM) was used as a control protein that repositions a centrally positioned nucleosome. The triangles indicate increasing concentrations of LSH protein in the reaction (25, 50, 100, 200, 300 nM).

**C.** LSH shows a weak DNA-stimulated ATPase activity, which is disrupted by the K237Q mutation in ATP binding site. The rate of ATP hydrolysis represents molecules ATP hydrolysed per minute per mol LSH.

**Table S1. Expression of DNA repair genes in wild-type and *Lsh*<sup>-/-</sup> MEFs**

The table contains an extract of expression microarray data from Myant et al (2011) *Genome Res* 21, 83-94 comparing the wild-type (WT) and *Lsh*<sup>-/-</sup> (KO) MEFs.

M.KO = log<sub>2</sub>(KO-WT)  
 FDR.KO = false discovery rate, after p-value adjustment for multiple testing (Benjamini-Hochberg method)  
 KO = log<sub>2</sub>(KO)  
 WT = log<sub>2</sub> (WT)

| Chr   | Gene Name             | Gene_ID | Description                                                                            | M.KO | FDR.KO | KO   | WT   | Fold change |
|-------|-----------------------|---------|----------------------------------------------------------------------------------------|------|--------|------|------|-------------|
| chr9  | H2afx                 | 15270   | H2A histone family, member X1                                                          | -0.2 | 0.071  | 13.1 | 13.0 | 0.9         |
| chr9  | Mre11a                | 17535   | meiotic recombination 11 homolog A (S. cerevisiae)                                     | -0.5 | 0.052  | 11.9 | 12.4 | 0.7         |
| chr11 | Rad50                 | 19360   | RAD50 homolog (S. cerevisiae)                                                          | -0.1 | 0.658  | 12.9 | 13.0 | 0.9         |
| chr4  | Nbn                   | 27354   | nibrin                                                                                 | -0.1 | 0.573  | 12.5 | 12.7 | 0.9         |
| chr15 | Xrcc6 (Ku70)          | 14375   | X-ray repair complementing defective repair in Chinese hamster ovary cell 6            | -0.7 | 0.013  | 12.3 | 12.9 | 0.6         |
| chr1  | Xrcc5 (Ku80)          | 22596   | X-ray repair complementing defective repair in Chinese hamster ovary cell 5            | -0.2 | 0.551  | 12.7 | 12.9 | 0.9         |
| chr9  | Atm                   | 11920   | ataxia telangiectasia mutated homolog (human)                                          | -0.3 | 0.135  | 11.3 | 11.5 | 0.8         |
| chr9  | Atr                   | 235533  | ataxia telangiectasia and Rad3 related                                                 | -0.1 | 0.743  | 8.4  | 8.6  | 0.9         |
| chr16 | Prkdc                 | 19090   | protein kinase, DNA activated, catalytic polypeptide chain                             | 0.6  | 0.008  | 11.8 | 11.1 | 1.5         |
| chr18 | Rbbp8 (CtIP)          | 225182  | retinoblastoma binding protein 8                                                       | -0.6 | 0.039  | 8.9  | 9.4  | 0.7         |
| chr1  | Exo1                  | 26909   | exonuclease 1                                                                          | -0.5 | 0.114  | 8.8  | 9.3  | 0.7         |
| chr7  | Blm                   | 12144   | Bloom syndrome homolog (human)                                                         | -1.2 | 0.000  | 11.3 | 12.4 | 0.4         |
| chr5  | Xrcc2 Rad51           | 57434   | X-ray repair complementing defective repair in Chinese hamster ovary cell 2            | -1.1 | 0.002  | 8.4  | 9.5  | 0.5         |
| chr11 | Rad51c                | 114714  | Rad51 homolog c (S. cerevisiae)                                                        | -0.4 | 0.083  | 7.6  | 8.0  | 0.8         |
| chr12 | Rad5111               | 19363   | RAD51-like 1 (S. cerevisiae)                                                           | -0.2 | 0.769  | 7.5  | 7.7  | 0.9         |
| chr11 | Rad5113               | 19364   | RAD51-like 3 (S. cerevisiae)                                                           | -0.2 | 0.626  | 7.5  | 7.8  | 0.9         |
| chr11 | Rpa1                  | 68275   | replication protein A1                                                                 | -0.5 | 0.041  | 12.2 | 12.5 | 0.7         |
| chr6  | Rad52                 | 19365   | RAD52 homolog (S. cerevisiae)                                                          | -0.3 | 0.153  | 11.6 | 11.9 | 0.8         |
| chr9  | Rad54l2               | 81000   | Rad54 like 2 (S. cerevisiae)                                                           | 0.4  | 0.102  | 10.4 | 10.1 | 1.3         |
| chr4  | Rad54l                | 19366   | RAD54 like (S. cerevisiae)                                                             | -0.7 | 0.011  | 12.3 | 13.0 | 0.6         |
| chr17 | Mdc1                  | 240087  | mediator of DNA damage checkpoint 1                                                    | 0.2  | 0.004  | 9.8  | 9.6  | 1.1         |
| chr19 | Rad9 (53BP1)          | 19367   | RAD9 homolog (S. pombe)                                                                | -0.3 | 0.020  | 12.8 | 13.0 | 0.8         |
| chr2  | Dclre1c (Artemis)     | 227525  | DNA cross-link repair 1C, PSO2 homolog (S. cerevisiae)                                 | 0.0  | 0.983  | 7.9  | 8.0  | 1.0         |
| chr13 | Xrcc4 (Ligase IV)     | 108138  | X-ray repair complementing defective repair in Chinese hamster ovary cell 4            | 0.0  | 0.889  | 9.9  | 10.0 | 1.0         |
| chr7  | Xrcc1 DNA lig3        | 22594   | X-ray repair complementing defective repair in Chinese hamster ovary cell 1            | -0.5 | 0.033  | 12.6 | 13.1 | 0.7         |
| chr12 | Xrcc3 HJ resolvase    | 74335   | X-ray repair complementing defective repair in Chinese hamster ovary cell 3            | 0.3  | 0.219  | 10.2 | 9.9  | 1.3         |
| chr15 | Rad1                  | 19355   | RAD1 homolog (S. pombe)                                                                | 0.0  | 0.941  | 11.3 | 11.3 | 1.0         |
| chr15 | Rad21                 | 19357   | RAD21 homolog (S. pombe)                                                               | 0.0  | 0.983  | 14.0 | 13.9 | 1.0         |
| chr13 | Rad17                 | 19356   | RAD17 homolog (S. pombe)                                                               | -0.2 | 0.420  | 12.4 | 12.6 | 0.9         |
| chr9  | Rad54l2               | 81000   | Rad54 like 2 (S. cerevisiae)                                                           | 0.4  | 0.102  | 10.4 | 10.1 | 1.3         |
| chr8  | Rad23a                | 19358   | RAD23a homolog (S. cerevisiae)                                                         | 0.6  | 0.007  | 13.5 | 13.0 | 1.5         |
| chr6  | Rad18                 | 58186   | RAD18 homolog (S. cerevisiae)                                                          | -0.8 | 0.002  | 11.1 | 11.9 | 0.6         |
| chr5  | Rad9b                 | 231724  | RAD9 homolog B (S. cerevisiae)                                                         | 0.7  | 0.059  | 7.3  | 6.7  | 1.6         |
| chr4  | Rad54l                | 19366   | RAD54 like (S. cerevisiae)                                                             | -0.7 | 0.011  | 12.3 | 13.0 | 0.6         |
| chr4  | Rad23b                | 19359   | RAD23b homolog (S. cerevisiae)                                                         | -0.3 | 0.245  | 14.3 | 14.5 | 0.8         |
| chr6  | Rad52                 | 19365   | RAD52 homolog (S. cerevisiae)                                                          | -0.3 | 0.153  | 11.6 | 11.9 | 0.8         |
| chr11 | Brca1                 | 12189   | breast cancer 1                                                                        | -0.2 | 0.001  | 11.8 | 11.7 | 0.9         |
| chr5  | Brca2                 | 12190   | breast cancer 2                                                                        | -0.3 | 0.002  | 11.0 | 11.3 | 0.8         |
| chr9  | Chek1 (Rad27)         | 12649   | checkpoint kinase 1 homolog (S. pombe)                                                 | -0.2 | 0.000  | 9.7  | 9.9  | 0.9         |
| chr5  | Chek2 (Rad53)         | 50883   | CHK2 checkpoint homolog (S. pombe)                                                     | -0.9 | 0.003  | 8.7  | 9.6  | 0.6         |
| chr11 | Trp53                 | 22059   | transformation related protein 53                                                      | 0.9  | 0.002  | 13.8 | 12.9 | 1.9         |
| chr19 | Htatip (Tip60)        | 81601   | HIV-1 tat interactive protein, homolog (human)                                         | -0.1 | 0.821  | 12.6 | 12.6 | 1.0         |
| chr7  | Htatip2               | 53415   | HIV-1 tat interactive protein 2, homolog (human)                                       | 0.4  | 0.002  | 7.8  | 7.4  | 1.4         |
| chr19 | Ddb1                  | 13194   | damage specific DNA binding protein 1                                                  | -0.2 | 0.397  | 14.8 | 15.0 | 0.9         |
| chr2  | Ddb2                  | 107986  | damage specific DNA binding protein 2                                                  | 0.5  | 0.103  | 10.1 | 9.7  | 1.4         |
| chr8  | Cul4a                 | 99375   | cullin 4A                                                                              | -0.5 | 0.031  | 13.4 | 13.9 | 0.7         |
| chrX  | Cul4b                 | 72584   | cullin 4B                                                                              | -0.3 | 0.148  | 13.1 | 13.5 | 0.8         |
| chr17 | Rnf8                  | 58230   | ring finger protein 8                                                                  | -0.8 | 0.003  | 11.5 | 12.2 | 0.6         |
| chr16 | Rnf168                | 70238   | ring finger protein 168                                                                | 0.0  | 0.967  | 10.6 | 10.6 | 1.0         |
| chr1  | Smarca1               | 54380   | SWI/SNF related matrix associated, actin dependent nucleosome assembly protein 1-like  | 0.5  | 0.092  | 10.7 | 10.3 | 1.4         |
| chr2  | Ino1 (Ino80)          | 68142   | INO80 complex homolog 1 (S. cerevisiae)                                                | 0.1  | 0.871  | 11.1 | 11.0 | 1.0         |
| chr3  | Smarca3 Hltf          | 20585   | SWI/SNF related, matrix associated, actin dependent nucleosome assembly protein 3-like | -1.2 | 0.000  | 9.9  | 11.1 | 0.4         |
| chr3  | Smarca3               | 20585   | SWI/SNF related, matrix associated, actin dependent nucleosome assembly protein 3-like | -0.9 | 0.002  | 7.6  | 8.6  | 0.5         |
| chr3  | Chd1l (ALC1)          | 68058   | chromodomain helicase DNA binding protein 1-like                                       | -1.5 | 0.000  | 10.9 | 12.3 | 0.3         |
| chr6  | Smarca1               | 13990   | SWI/SNF-related, matrix-associated actin-dependent nucleosome assembly protein 1-like  | -0.5 | 0.051  | 10.5 | 10.9 | 0.7         |
| chr8  | Smarca5 Snf2h, WCRF13 | 93762   | SWI/SNF related, matrix associated, actin dependent nucleosome assembly protein 5-like | -0.5 | 0.059  | 13.4 | 13.9 | 0.7         |
| chr9  | Smarca4 (Brg)         | 20586   | SWI/SNF related, matrix associated, actin dependent nucleosome assembly protein 4-like | -0.2 | 0.504  | 13.4 | 13.5 | 0.9         |
| chr19 | Smarca2 (Brm)         | 67155   | SWI/SNF related, matrix associated, actin dependent nucleosome assembly protein 2-like | -0.1 | 0.827  | 13.6 | 13.6 | 1.0         |
| chrX  | Smarca1 Snf2L         | 93761   | SWI/SNF related, matrix associated, actin dependent nucleosome assembly protein 1-like | -2.1 | 0.001  | 6.9  | 8.9  | 0.2         |
| chr6  | Chd4                  | 107932  | chromodomain helicase DNA binding protein 4                                            | 0.2  | 0.636  | 14.4 | 14.2 | 1.1         |
| chr19 | Ppp1ca                | 19045   | protein phosphatase 1, catalytic subunit, alpha isoform                                | -0.4 | 0.056  | 14.4 | 14.8 | 0.8         |
| chr11 | Ppp2ca                | 19052   | protein phosphatase 2 (formerly 2A), catalytic subunit                                 | 0.0  | 0.924  | 12.7 | 12.7 | 1.0         |
| chr7  | Ppp4c                 | 56420   | protein phosphatase 4, catalytic subunit                                               | 0.2  | 0.477  | 14.2 | 14.0 | 1.1         |
| chr2  | Ppp6c                 | 67857   | protein phosphatase 6, catalytic subunit                                               | 0.5  | 0.057  | 13.4 | 12.9 | 1.4         |
| chr11 | Ppm1d (Wip1)          | 53892   | protein phosphatase 1D magnesium-dependent, deleted in liver cancer 1                  | 0.0  | 0.924  | 10.0 | 10.0 | 1.0         |
